# Supplementary material for: Atomically dispersed Pd sites on Ti-SBA-15 for efficient catalytic combustion of typical gaseous VOCs
Source: Royal Society of Chemistry journal article supplement (doi:10.1039/d1en00744k), 2021-01-01
Supplement: d1en00744k1.pdf [file d1en00744k1.pdf]

# Atomic Dispersed Pd site on Ti-SBA-15 for Efficient Catalytic Combustion of Typical Gaseous VOCs

Meicheng Wen,<sup>a,b</sup> Shengnan Song,<sup>a,b</sup> Weina Zhao,<sup>a,b</sup> Qiuxia Liu,<sup>a,b</sup> Jiangyao Chen,<sup>a,b</sup> Guiying Li,<sup>a,b</sup> Taicheng An,<sup>a,b</sup>\*

<sup>a</sup> Guangdong-Hong Kong-Macao Joint Laboratory for Contaminants Exposure and Health, Guangdong Key Laboratory of Environmental Catalysis and Health Risk Control, Institute of Environmental Health and Pollution control, Guangdong University of Technology, Guangzhou 510006, China;

<sup>b</sup> Guangdong Engineering Technology Research Center for Photocatalytic Technology Integration and Equipment, Guangzhou Key Laboratory of Environmental Catalysis and Pollution Control, School of Environmental Science and Engineering, Guangdong University of Technology, Guangzhou 510006, China.

Corresponding Authors:

Prof. Taicheng An. (E-mail: antc99@gdut.edu.cn).

## Synthesis of Pd0.5 NPs/Ti-SBA-15 catalyst

Reference sample, Pd0.5 NPs/Ti-SBA-15, was synthesized by using NaBH<sub>4</sub> as reducing agent. Typically, a certain amount of Pd precursor was added into the PVP (Pd/PVP mass ratio=1:1.2) in the deionized water, stirring for 6 h. Then a moderate amount of Ti-SBA-15 dispersed into methanol was added into the mixed solution. The mixture was further vigorously stirred for 3 h. Then, a considerable amount of NaBH<sub>4</sub> dissolved in deionized water was dropwise added. After continuously stirring for 1 h, the solid sample was filtered and dried at 60 °C in an oven for overnight. Finally, the solid sample was calcined at a ramp of 2 °C/min from room temperature to 500 °C and kept at this temperature for 3h in a muffle furnace, hence obtaining the Pd0.5 NPs/Ti-SBA-15 catalyst. The actual loading amount of Pd0.5 NPs/Ti-SBA-15 was determined by ICP-AES to be 0.52 wt%.

## DFT calculation

The adsorption energy ( $E_{\text{ads}}$ ) of styrene, cyclohexane and n-hexane on the Pd site was calculated basing on the adsorption configuration a:

$$E_{\text{ads}} = E_{\text{VOC/surface}} - (E_{\text{VOC}} + E_{\text{surface}})$$

where  $E_{\text{surface}}$  is the total energy of adsorption configuration a, and the  $E_{\text{VOC/surface}}$  is the total energy of the VOC/surface. While, the  $E_{\text{VOC}}$  is the free energy of styrene, cyclohexane and n-hexane. The more negative value from this equation indicated the stronger adsorption accordingly.

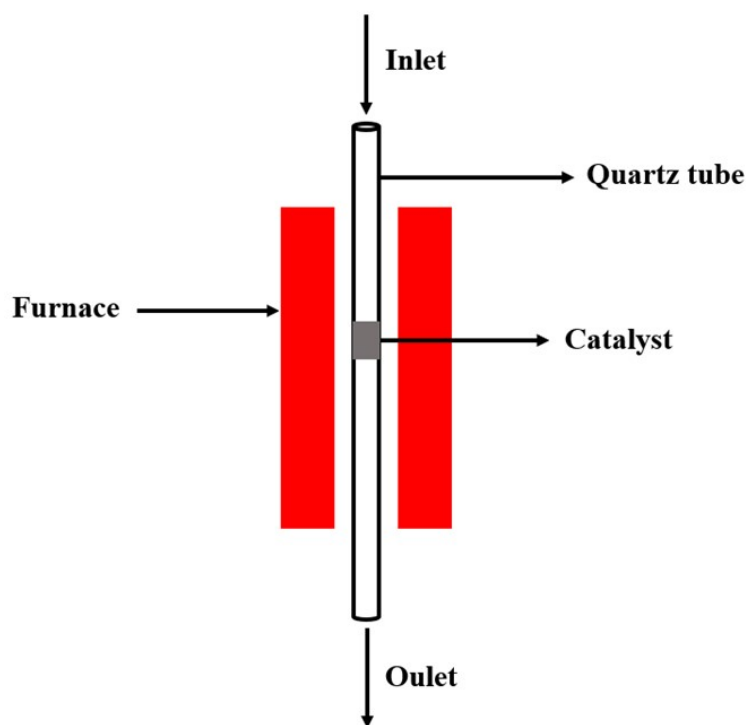

**Fig. S1.** Schematic diagram of the thermal reactor.

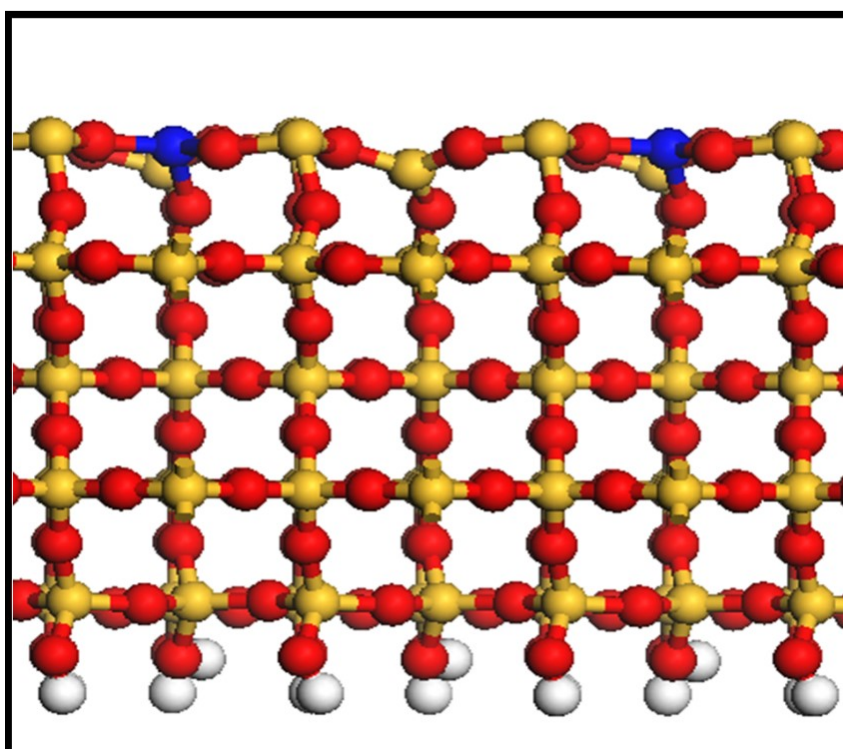

**Fig. S2.** Optimized configurations of the Ti-SBA-15. The red, yellow, blue and white spheres represent O, Si, Ti and H atoms, respectively.

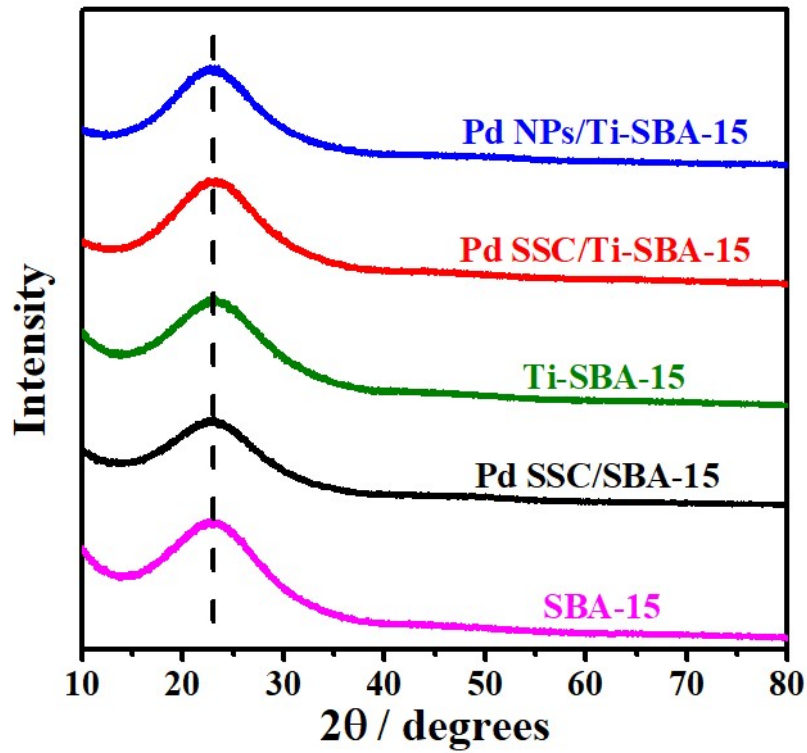

Fig. S3. Wide-angle XRD patterns of the as-prepared samples.

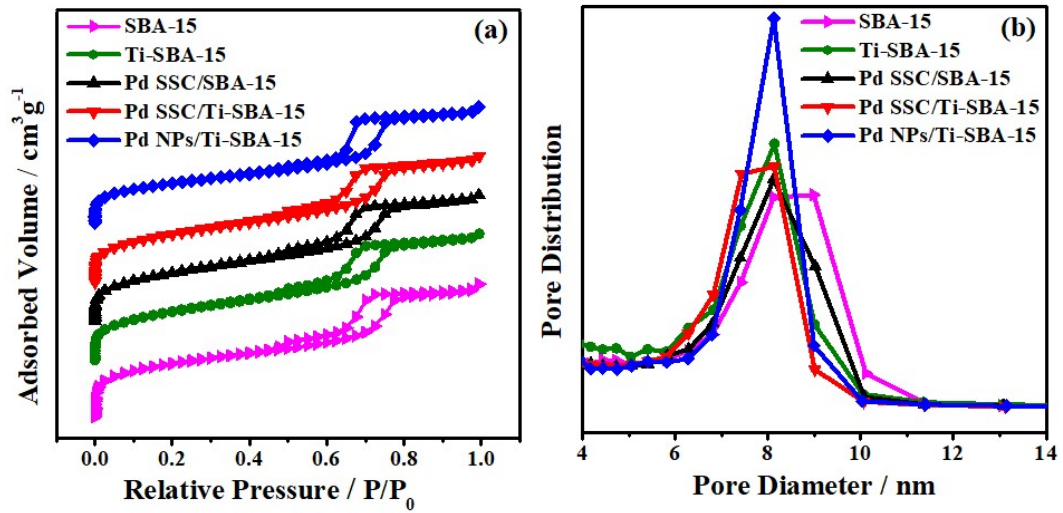

Fig. S4. (a)  $N_2$  adsorption-desorption isotherms and (b) Pore size distributions of as-prepared samples.

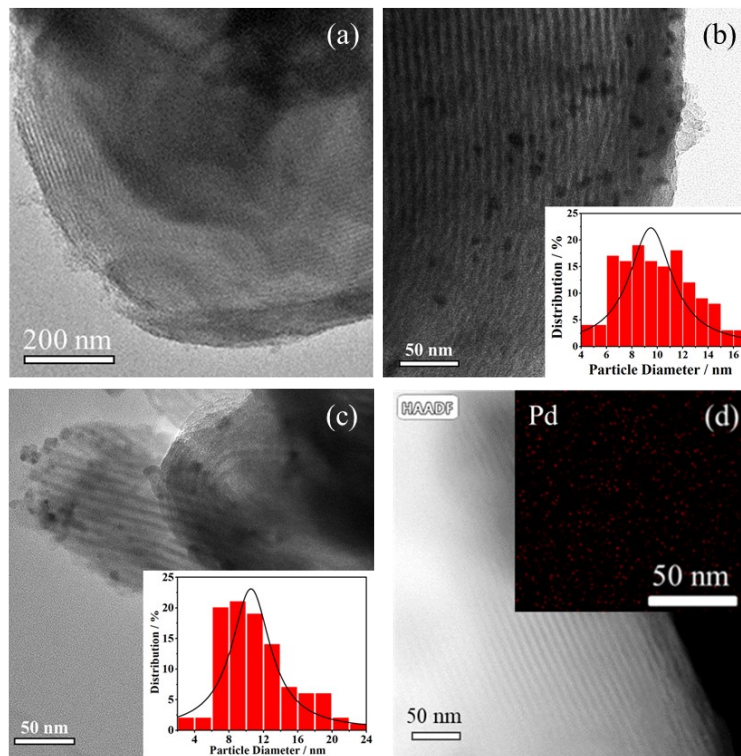

**Fig. S5.** HR-TEM images of (a) Pd SSC/SBA-15, (b) Pd NPs/Ti-SBA-15, (c) Pd<sub>0.5</sub> NPs/Ti-SBA-15 and the size distribution images of Pd nanoparticles of Pd NPs/Ti-SBA-15 and Pd<sub>0.5</sub> NPs/Ti-SBA-15 sample (inset) and (d) HADDF-STEM and EDX elemental mapping of Pd (inset) of recycled Pd SSC/Ti-SBA-15.

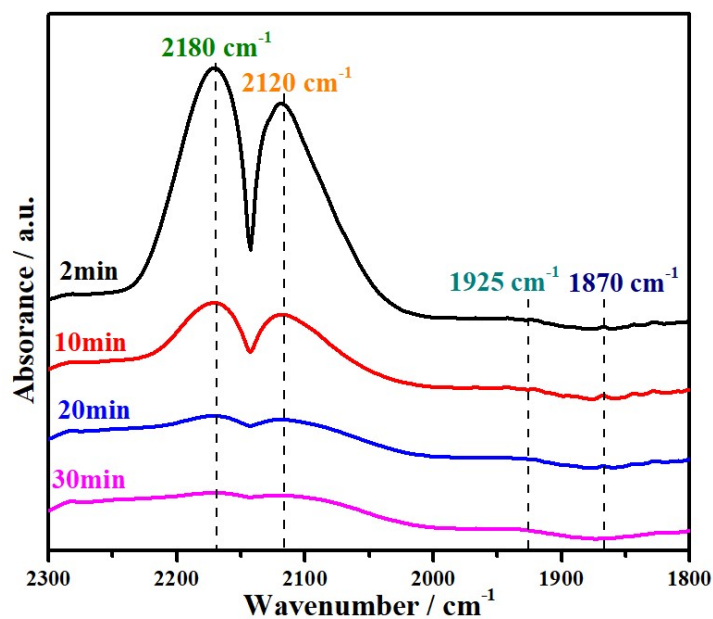

**Fig. S6.** In-situ DRIFT spectra of CO adsorbed on Pd NPs/Ti-SBA-15 with different time in the N<sub>2</sub> flow (30.0 mL/min) at 30 °C.

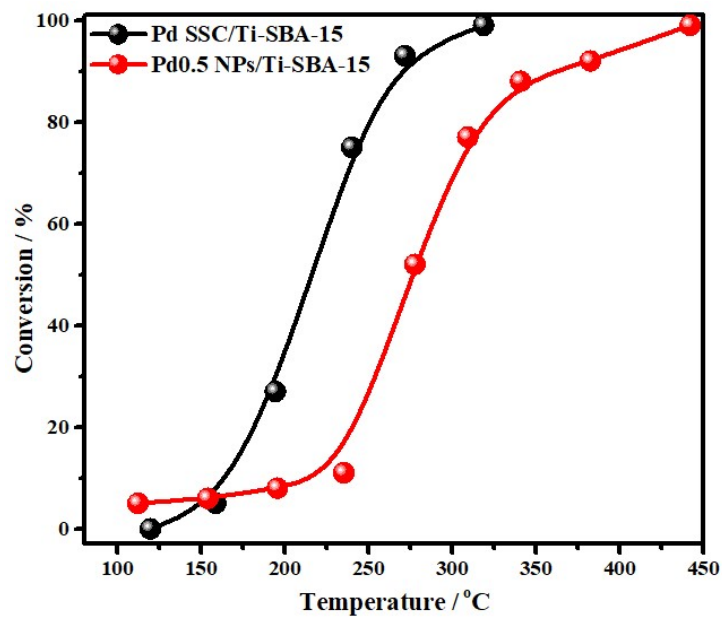

**Fig. S7.** Cyclohexane conversion as a function of temperature over Pd SSC/Ti-SBA-15 and Pd0.5 NPs/Ti-SBA-15.

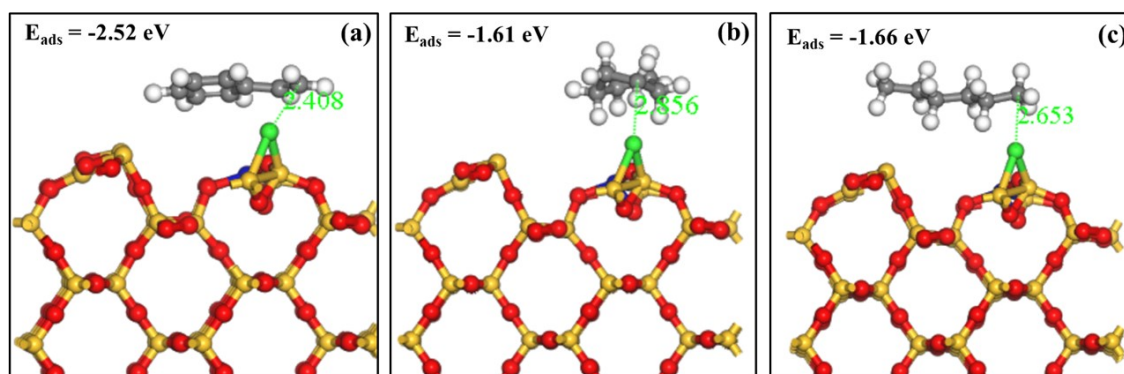

**Fig. S8.** Configurations for styrene (a), cyclohexane (b) and n-hexane (c) adsorption on the Pd site of Pd SSC/Ti-SBA-15. The red, yellow, blue, green and white spheres represent O, Si, Ti, Pd and H atoms, respectively.

**Table S1.** Textural parameters of various prepared samples.

| Sample         | Surface area | Pore diameter | Pore volume | Pd content (wt%) | Ti content (wt%) |
|----------------|--------------|---------------|-------------|------------------|------------------|
| SBA-15         | 1024.081     | 8.984         | 0.760       | 0                | 0                |
| Ti-SBA-15      | 911.034      | 8.318         | 0.766       | 0                | 0.14             |
| Pd SSC/SBA-15  | 891.906      | 8.117         | 0.708       | 0.05             | 0                |
| Pd SSC/Ti-SBA- | 859.942      | 8.315         | 0.683       | 0.04             | 0.14             |
| Pd NPs/Ti-SBA- | 770.437      | 8.124         | 0.753       | 0.05             | 0.13             |

**Table S2.** Different conversions temperatures of cyclohexane onto the prepared samples.

| Catalyst            | T <sub>50</sub> (°C) | T <sub>90</sub> (°C) |
|---------------------|----------------------|----------------------|
| Pd SSC/SBA-15       | 340                  | 420                  |
| Pd SSC/Ti-SBA-15    | 220                  | 270                  |
| Pd NPs/Ti-SBA-15    | 350                  | 500                  |
| Pd0.5 NPs/Ti-SBA-15 | 275                  | 370                  |

**Table S3.** Adsorption energies of Pd atom on different configurations over Pd SSC/Ti-SBA-15.

| Configurations | Eads (eV) |
|----------------|-----------|
| a              | -4.95     |
| b              | -4.57     |
| c              | -4.52     |

**Table S4.** Different conversions temperatures of different VOCs on Pd SSC/Ti-SBA-15.

| VOC         | T <sub>50</sub> (°C) | T <sub>90</sub> (°C) |
|-------------|----------------------|----------------------|
| Styrene     | 180                  | 210                  |
| Cyclohexane | 220                  | 270                  |
| n-hexane    | 275                  | 310                  |

**Table S5.** Recent works of catalytic VOCs combustion over different catalysts.

| Sample                                                            | VOC          | Concentration ppm | Loading Amount (wt%) | T <sub>50</sub> (°C) | T <sub>90</sub> (°C) | Ref       |
|-------------------------------------------------------------------|--------------|-------------------|----------------------|----------------------|----------------------|-----------|
| Pt/Al <sub>2</sub> O <sub>3</sub>                                 | cyclopentane | 6200              | 0.26                 | 312                  | -                    | 1         |
| Au/TiO <sub>2</sub>                                               | n-hexane     | 125               | 3                    | 350                  | -                    | 2         |
| Pt/Al <sub>2</sub> O <sub>3</sub>                                 | n-hexane     | 1500              | 0.12                 | 300                  | 400                  | 3         |
| Ce <sub>0.99</sub> Cu <sub>0.01</sub> O <sub>2</sub>              | n-hexane     | 260               | -                    | -                    | 400                  | 4         |
| CuO/Al <sub>2</sub> O <sub>3</sub>                                | styrene      | 1000              | 8.2                  | 240                  | 325                  | 5         |
| PtCu/CeO <sub>2</sub>                                             | n-pentane    | 50                | 0.08                 | 300                  | 400                  | 6         |
| Pd/SBA-15                                                         | toluene      | 650               | 0.3                  | 261                  | 292                  | 7         |
| Pd/C                                                              | toluene      | 1000              | 0.5                  | 280                  | 360                  | 8         |
| Pd/TiO <sub>2</sub>                                               | toluene      | 1000              | 0.5                  | 230                  | 250                  | 9         |
| Pd/ V <sub>2</sub> O <sub>5</sub> /Al <sub>2</sub> O <sub>3</sub> | benzene      | 482               | 5                    | 280                  | 310                  | 10        |
| Pd SSC/Ti-SBA-15                                                  | styrene      | 50                | 0.04                 | 180                  | 210                  | this work |
| Pd SSC/Ti-SBA-15                                                  | cyclohexane  | 40                | 0.04                 | 220                  | 270                  | this work |
| Pd SSC/Ti-SBA-15                                                  | n-hexane     | 40                | 0.04                 | 275                  | 310                  | this work |



## Reference

1. T. F. Garetto and C. R. Apesteguia, Oxidative catalytic removal of hydrocarbons over Pt/Al<sub>2</sub>O<sub>3</sub> catalysts, *Catalysis Today*, 2000, **62**, 189-199.
2. C. Cellier, S. Lambert, E. M. Gaigneaux, C. Poleunis, V. Ruaux, P. Eloy, C. Lahousse, P. Bertrand, J. P. Pirard and P. Grange, Investigation of the preparation and activity of gold catalysts in the total oxidation of n-hexane, *Applied Catalysis B: Environmental*, 2007, **70**, 406-416.
3. M. Anic, N. Radic, B. Grbic, V. Dondur, L. Damjanovic, D. Stoychev and P. Stefanov, Catalytic activity of Pt catalysts promoted by MnO<sub>x</sub> for n-hexane oxidation, *Appl Catal B-Environ*, 2011, **107**, 327-332.
4. V. D. Araujo, M. M. de Lima, Jr., A. Cantarero, M. I. B. Bernardi, J. D. A. Bellido, E. M. Assaf, R. Balzer, L. F. D. Probst and H. V. Fajardo, Catalytic oxidation of n-hexane promoted by Ce<sub>(1-x)</sub>Cu<sub>(x)</sub>O<sub>2</sub> catalysts prepared by one-step polymeric precursor method, *Materials Chemistry and Physics*, 2013, **142**, 677-681.
5. H. Pan, Z. He, Q. Lin, F. Liu and Z. Li, The effect of copper valence on catalytic combustion of styrene over the copper based catalysts in the absence and presence of water vapor, *Chinese Journal of Chemical Engineering*, 2016, **24**, 468-474.
6. J. Kong, G. Li, M. Wen, J. Chen, H. Liu and T. An, The synergic degradation mechanism and photothermocatalytic mineralization of typical VOCs over PtCu/CeO<sub>2</sub> ordered porous catalysts under simulated solar irradiation, *Journal of Catalysis*, 2019, **370**, 88-96.
7. C. He, J. J. Li, J. Cheng, L. D. Li, P. Li, Z. P. Hao and Z. P. Xu, Comparative Studies on Porous Material-Supported Pd Catalysts for Catalytic Oxidation of Benzene, Toluene, and Ethyl Acetate, *Industrial & Engineering Chemistry Research*, 2009, **48**, 6930-6936.
8. J. Bedia, J. M. Rosas, J. Rodriguez-Mirasol and T. Cordero, Pd supported on mesoporous activated carbons with high oxidation resistance as catalysts for toluene oxidation, *Appl Catal B-Environ*, 2010, **94**, 8-18.
9. J. C. Rooke, T. Barakat, S. Siffert and B. L. Su, Total catalytic oxidation of toluene using Pd impregnated on hierarchically porous Nb<sub>2</sub>O<sub>5</sub> and Ta<sub>2</sub>O<sub>5</sub> supports, *Catalysis Today*, 2012, **192**, 183-188.
10. R. S. G. Ferreira, P. G. P. de Oliveira and F. B. Noronha, Characterization and catalytic activity of Pd/V<sub>2</sub>O<sub>5</sub>/Al<sub>2</sub>O<sub>3</sub> catalysts on benzene total oxidation, *Applied Catalysis B: Environmental*, 2004, **50**, 243-249.
